# Supplementary material for: Celiac disease diagnosis: transglutaminase, duodenal biopsy and genetic tests correlations
Source: PubMed Central journal article supplement (PMC11390444; doi:10.3389/fped.2024.1330511), 2024-08-29
Supplement: Datasheet1.pdf [file Datasheet1.pdf]

## Supplementary figures:

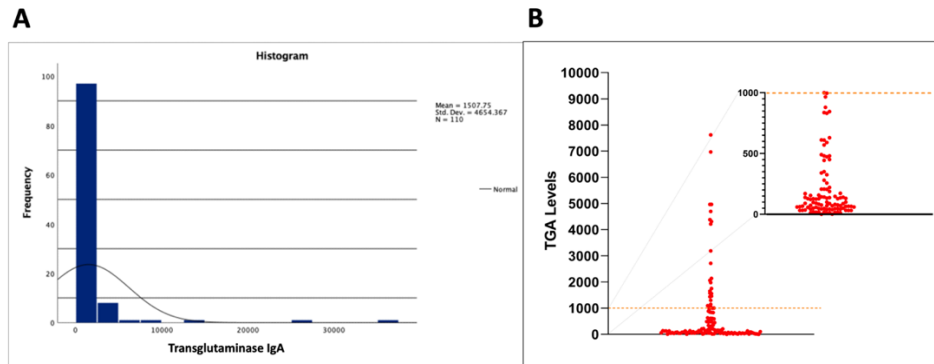

Supplementary Figure 1

Transglutaminase levels of cases. (S1A) Histogram and (S1B) scatter plot of in patients with a non-normal distribution.

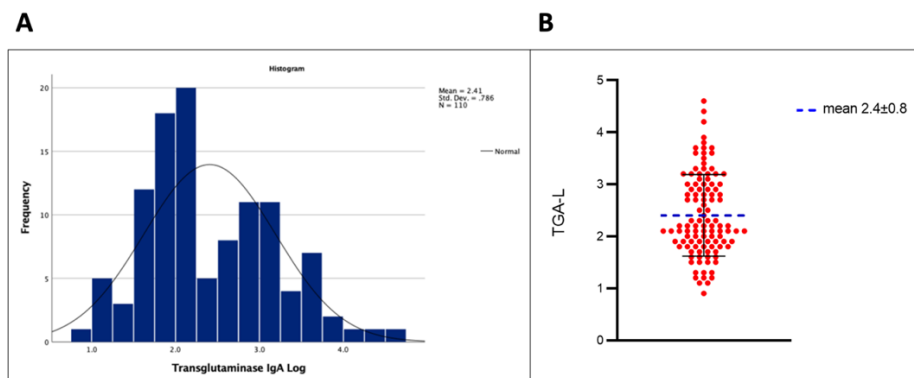

Supplementary Figure 2

Transglutaminase levels of cases. (A) Histogram and (B) scatter plot after logarithmic transformation (TGA-L) with a normal distribution.
